# Supplementary material for: Associating transcriptional regulation for rapid germination of rapeseed (Brassica napus L.) under low temperature stress through weighted gene co-expression network analysis
Source: PubMed Central journal article supplement (PMC6329770; doi:10.1038/s41598-018-37099-0), 2019-01-11

**Associating transcriptional regulation for rapid germination  
of rapeseed (*Brassica napus* L.) under low temperature  
stress through weighted gene co-expression network analysis**

Tao Luo, Mengzhu Xian, Chen Zhang, Chunni Zhang, Liyong Hu and Zhenghua Xu\*

**Institutional addresses:**

MOA Key Laboratory of Crop Ecophysiology and Farming System in the Middle  
Reaches of the Yangtze River/College of Plant Science and Technology, Huazhong  
Agricultural University, Wuhan 430070, China.

**Email addresses:**

Tao Luo: [luotao28@webmail.hzau.edu.cn](mailto:luotao28@webmail.hzau.edu.cn)

Mengzhu Xian, [xianmengzhu\\_misty@126.com](mailto:xianmengzhu_misty@126.com)

Chen Zhang: 997542363@qq.com

Chunni Zhang: 1030591475@qq.com

Liyong Hu: [liyonghu@mail.hzau.edu.cn](mailto:liyonghu@mail.hzau.edu.cn)

\*For correspondence: [xzh@mail.hzau.edu.cn](mailto:xzh@mail.hzau.edu.cn)

**Additional file 1: The mean germination time of different genotypes under normal and low temperature conditions and their seed components.** The MGT represents the index of mean germination time. The LT and CK indicate germination treatment under the low temperature and normal temperature, respectively. The seed quality indexes including linoleic acid (%), linolenic acid (%), oil content (%), oleic acid (%), palmitic acid (%), paullinic acid (%), protein content (%), stearic acid (%) and thioglycoside ( $\mu\text{mol/g}$ ) for screened genotypes were analyzed with intact seeds weighted about 8 g by using a Near Infrared Reflectance Spectroscopy System.

| Genotypes    | MGT  |      | Protein content<br>% | Thioglycoside<br>$\mu\text{mol/g}$ | Oil content<br>% | Linolenic acid<br>% | Linoleic acid<br>% | Stearic acid<br>% | Oleic acid<br>% | Palmitic acid<br>% | Paullinic acid<br>% | 1000 seeds weight<br>g |
|--------------|------|------|----------------------|------------------------------------|------------------|---------------------|--------------------|-------------------|-----------------|--------------------|---------------------|------------------------|
|              | LT   | CK   |                      |                                    |                  |                     |                    |                   |                 |                    |                     |                        |
| 1321         | 3.61 | 1.96 | 19.29                | 31.57                              | 47.75            | 8.10                | 21.05              | 1.31              | 57.07           | 3.45               | 4.04                | 3.43                   |
| 01188        | 3.63 | 1.80 | 19.95                | 22.40                              | 50.25            | 9.68                | 22.15              | 1.38              | 62.42           | 3.68               | 2.25                | 3.09                   |
| 10-804       | 3.48 | 2.02 | 21.44                | 47.83                              | 41.95            | 9.75                | 18.49              | 1.15              | 56.28           | 3.91               | 3.54                | 4.99                   |
| 2011-7103    | 3.69 | 1.41 | 19.77                | 47.17                              | 46.03            | 9.70                | 20.29              | 1.27              | 58.76           | 4.29               | 3.89                | 4.05                   |
| 2012-8355    | 3.54 | 1.98 | 23.16                | 39.34                              | 42.68            | 9.92                | 18.82              | 1.17              | 57.27           | 3.98               | 3.61                | 3.92                   |
| 2012-9354    | 3.73 | 1.94 | 19.83                | 31.89                              | 50.40            | 9.71                | 20.22              | 1.39              | 58.62           | 4.69               | 3.96                | 4.29                   |
| 9F087        | 3.63 | 1.78 | 20.42                | 33.92                              | 48.61            | 7.30                | 16.43              | 1.34              | 63.22           | 4.53               | 3.11                | 3.51                   |
| Chuangyou 40 | 4.23 | 2.01 | 29.38                | 42.89                              | 39.13            | 10.46               | 18.09              | 1.26              | 62.12           | 4.03               | 3.93                | 5.06                   |
| CY12GJ-1     | 3.39 | 1.70 | 17.52                | 38.75                              | 46.29            | 10.76               | 20.41              | 1.27              | 60.12           | 4.31               | 2.91                | 4.74                   |
| CY12PXW-9    | 3.71 | 2.03 | 17.54                | 35.97                              | 47.14            | 10.96               | 17.78              | 1.30              | 59.26           | 4.39               | 3.98                | 3.49                   |
| CY15PXW-31   | 3.45 | 1.92 | 18.47                | 40.45                              | 53.55            | 9.44                | 20.61              | 1.47              | 58.85           | 4.99               | 2.03                | 3.04                   |
| Dadi 95      | 3.68 | 1.57 | 21.79                | 31.24                              | 48.77            | 10.71               | 17.09              | 1.17              | 66.89           | 3.25               | 0.22                | 3.83                   |
| Dadi 99      | 3.65 | 1.65 | 19.25                | 31.95                              | 51.74            | 12.13               | 19.56              | 1.20              | 63.55           | 3.79               | 2.14                | 4.07                   |
| Defuyou 508  | 2.35 | 1.33 | 26.67                | 92.31                              | 41.07            | 9.50                | 14.39              | 0.87              | 47.35           | 3.37               | 6.61                | 5.00                   |
| Deheyong 898 | 5.89 | 2.68 | 25.20                | 104.93                             | 43.54            | 8.79                | 13.94              | 1.03              | 32.04           | 3.23               | 10.42               | 4.27                   |
| Dehuiyou 50  | 3.43 | 1.18 | 26.76                | 97.29                              | 43.58            | 9.30                | 13.24              | 0.89              | 31.26           | 3.00               | 11.24               | 5.44                   |
| Dehuiyou 903 | 4.32 | 1.79 | 26.61                | 86.52                              | 39.52            | 8.62                | 15.63              | 0.76              | 42.93           | 3.63               | 5.91                | 2.99                   |

|                |      |      |       |        |       |       |       |      |       |      |       |      |
|----------------|------|------|-------|--------|-------|-------|-------|------|-------|------|-------|------|
| Dexinyou 59    | 3.86 | 1.56 | 25.84 | 29.19  | 43.49 | 9.34  | 18.53 | 1.25 | 60.82 | 3.84 | 2.76  | 3.79 |
| Deyou No. 5    | 4.34 | 1.72 | 24.11 | 84.01  | 44.75 | 9.52  | 14.78 | 1.06 | 37.17 | 3.37 | 8.27  | 4.13 |
| Deyou No. 8    | 5.44 | 2.47 | 26.96 | 41.79  | 40.85 | 9.27  | 18.86 | 1.32 | 62.22 | 4.08 | 2.52  | 3.61 |
| Deyou No. 9    | 3.30 | 1.18 | 24.94 | 94.14  | 42.52 | 9.42  | 14.20 | 0.74 | 41.34 | 3.45 | 7.22  | 4.06 |
| Deyouza 108    | 4.08 | 1.78 | 25.51 | 100.75 | 43.63 | 9.03  | 14.38 | 1.06 | 29.31 | 3.19 | 10.52 | 4.07 |
| Fengyou 5103   | 3.17 | 1.18 | 25.60 | 41.12  | 43.05 | 9.80  | 18.84 | 1.32 | 60.77 | 4.02 | 4.00  | 3.76 |
| Fengyou 701    | 4.96 | 2.15 | 30.45 | 103.98 | 35.79 | 10.53 | 21.29 | 0.95 | 58.26 | 4.44 | 2.61  | 4.83 |
| Fengyou 730    | 2.84 | 1.05 | 22.16 | 36.78  | 44.84 | 11.01 | 21.17 | 1.40 | 57.72 | 4.18 | 3.19  | 4.00 |
| Fengyou 737    | 2.16 | 1.88 | 23.88 | 34.49  | 44.42 | 9.25  | 18.90 | 1.42 | 63.19 | 4.10 | 3.68  | 3.76 |
| Fengyou No. 9  | 5.27 | 2.30 | 24.86 | 101.82 | 42.99 | 9.91  | 13.71 | 0.87 | 40.66 | 3.29 | 7.78  | 4.43 |
| Fuyou 668      | 3.54 | 2.10 | 25.31 | 49.23  | 42.63 | 8.65  | 18.85 | 1.03 | 61.50 | 4.04 | 2.51  | 4.01 |
| Ganyou 105     | 2.56 | 1.16 | 27.33 | 37.20  | 36.55 | 9.74  | 20.18 | 1.44 | 58.39 | 4.03 | 3.06  | 3.56 |
| Ganyouza 108   | 4.65 | 2.31 | 25.23 | 57.32  | 41.92 | 10.66 | 18.18 | 1.19 | 48.61 | 4.08 | 5.97  | 4.31 |
| Ganyouza No. 2 | 3.35 | 1.70 | 26.95 | 29.48  | 40.82 | 7.44  | 19.85 | 1.26 | 64.26 | 4.08 | 3.48  | 3.58 |
| Ganyouza No. 5 | 2.92 | 1.68 | 27.47 | 43.46  | 37.18 | 8.92  | 19.45 | 1.19 | 62.84 | 4.11 | 3.41  | 5.15 |
| Ganyouza No. 6 | 4.45 | 1.27 | 25.42 | 101.05 | 44.83 | 9.92  | 14.18 | 0.77 | 29.54 | 3.26 | 9.24  | 3.45 |
| Ganyouza No. 7 | 4.19 | 2.23 | 27.01 | 37.05  | 40.09 | 9.27  | 20.17 | 1.27 | 61.10 | 4.00 | 2.35  | 4.54 |
| Ganyouza No. 8 | 3.71 | 1.90 | 23.42 | 43.87  | 46.61 | 10.61 | 13.72 | 0.91 | 69.25 | 3.39 | 1.33  | 6.36 |
| Guoyou 1304    | 3.37 | 1.60 | 26.64 | 34.94  | 44.50 | 9.64  | 16.09 | 1.28 | 64.46 | 3.68 | 3.41  | 4.22 |
| Heshengyou 555 | 4.06 | 2.05 | 25.52 | 42.08  | 41.00 | 10.20 | 19.20 | 1.06 | 63.34 | 4.07 | 1.29  | 4.27 |
| Heshengyou 868 | 4.12 | 2.07 | 25.41 | 43.10  | 41.00 | 10.34 | 18.72 | 1.09 | 63.49 | 4.00 | 1.35  | 2.96 |
| Heza 575       | 3.63 | 1.84 | 23.30 | 70.61  | 44.07 | 9.47  | 14.77 | 0.98 | 36.27 | 3.27 | 8.51  | 3.97 |
| HN1            | 4.68 | 2.07 | 26.87 | 36.39  | 40.58 | 10.18 | 19.64 | 1.26 | 56.15 | 4.23 | 4.47  | 2.80 |
| HN104          | 4.36 | 1.99 | 25.65 | 26.27  | 42.10 | 6.08  | 17.25 | 1.41 | 66.54 | 3.58 | 3.26  | 4.04 |
| HN2            | 2.90 | 1.48 | 27.51 | 35.80  | 44.02 | 9.53  | 17.16 | 1.44 | 59.84 | 3.52 | 4.91  | 2.77 |

|                  |      |      |       |        |       |       |       |      |       |      |       |      |
|------------------|------|------|-------|--------|-------|-------|-------|------|-------|------|-------|------|
| HN3              | 3.57 | 1.52 | 29.06 | 30.75  | 38.67 | 8.87  | 20.76 | 1.28 | 58.64 | 4.12 | 2.83  | 2.16 |
| HN4              | 3.99 | 1.71 | 27.24 | 31.80  | 41.37 | 9.32  | 19.21 | 1.34 | 59.63 | 3.92 | 2.55  | 2.67 |
| Huaganyou No. 1  | 4.93 | 2.37 | 26.44 | 38.76  | 40.15 | 8.93  | 19.68 | 1.17 | 59.74 | 4.20 | 3.19  | 3.43 |
| Huahang 901      | 3.77 | 1.75 | 18.79 | 38.48  | 51.29 | 11.33 | 16.57 | 1.21 | 62.28 | 3.83 | 1.97  | 3.83 |
| Huashuang No. 4  | 3.51 | 1.99 | 24.20 | 41.40  | 41.59 | 10.25 | 19.06 | 1.31 | 58.01 | 4.09 | 4.47  | 3.86 |
| Huashuang No. 5  | 4.83 | 2.02 | 24.36 | 49.57  | 41.92 | 10.32 | 17.48 | 1.29 | 59.95 | 4.10 | 5.72  | 4.08 |
| Huawanyou No. 4  | 4.59 | 1.85 | 25.21 | 93.72  | 44.31 | 9.47  | 15.72 | 0.99 | 29.51 | 3.29 | 9.96  | 4.14 |
| Huayouza 62      | 3.60 | 1.67 | 27.41 | 30.04  | 40.28 | 10.68 | 20.19 | 1.31 | 59.22 | 4.04 | 2.30  | 4.24 |
| Huayouza 95      | 2.72 | 1.07 | 22.55 | 37.51  | 44.76 | 11.94 | 23.52 | 1.13 | 55.36 | 4.48 | 1.27  | 4.21 |
| Huayouza NO.10   | 4.04 | 1.60 | 27.27 | 39.02  | 38.86 | 10.26 | 19.29 | 1.15 | 60.88 | 4.24 | 2.36  | 4.27 |
| Huayouza NO.12   | 4.03 | 2.57 | 23.78 | 44.70  | 39.80 | 10.47 | 21.01 | 1.20 | 56.81 | 4.49 | 1.77  | 3.96 |
| Huayouza NO.13   | 3.59 | 1.77 | 25.85 | 39.40  | 38.81 | 8.65  | 21.05 | 0.95 | 64.49 | 4.47 | 0.96  | 3.78 |
| Huayouza NO.14   | 3.43 | 1.63 | 25.46 | 39.46  | 39.49 | 9.00  | 20.45 | 0.86 | 63.22 | 4.40 | 0.57  | 3.95 |
| Huayouza No. 9   | 3.07 | 1.09 | 26.42 | 43.01  | 40.62 | 10.06 | 19.84 | 0.93 | 63.07 | 4.12 | 1.00  | 4.24 |
| Huaza 291        | 2.79 | 1.79 | 25.57 | 32.56  | 40.66 | 10.18 | 21.68 | 1.56 | 61.93 | 4.05 | 2.00  | 4.70 |
| Junlongyou No. 5 | 3.93 | 1.81 | 23.53 | 107.01 | 44.79 | 10.46 | 14.03 | 0.84 | 32.73 | 3.40 | 9.17  | 4.38 |
| Liangyou No. 9   | 4.07 | 1.65 | 24.95 | 37.98  | 44.66 | 10.99 | 17.89 | 1.24 | 61.08 | 3.76 | 2.91  | 4.48 |
| Mianxinyou 78    | 2.41 | 1.27 | 23.60 | 37.18  | 45.05 | 10.28 | 18.84 | 1.27 | 63.58 | 3.94 | 1.97  | 3.71 |
| Mianyou No.11    | 3.92 | 1.49 | 25.02 | 54.67  | 44.80 | 8.23  | 15.55 | 0.71 | 24.78 | 3.27 | 11.32 | 3.89 |
| Ningza No. 19    | 4.46 | 1.91 | 26.36 | 31.13  | 41.32 | 8.73  | 19.61 | 1.39 | 63.41 | 4.15 | 3.49  | 3.24 |
| Qingza No. 7     | 2.67 | 1.38 | 25.27 | 35.62  | 44.61 | 11.92 | 20.11 | 1.32 | 58.42 | 3.97 | 2.53  | 3.51 |
| Qinyou No.10     | 3.80 | 1.64 | 24.72 | 39.20  | 43.31 | 9.53  | 21.76 | 1.38 | 58.63 | 4.45 | 3.67  | 2.96 |
| Qinyou No. 7     | 4.14 | 1.38 | 31.37 | 39.07  | 34.87 | 10.37 | 23.31 | 1.21 | 54.67 | 4.73 | 3.03  | 4.52 |
| Qinyou No. 9     | 3.98 | 1.44 | 24.87 | 41.41  | 43.24 | 9.98  | 20.94 | 1.35 | 57.19 | 4.31 | 3.81  | 2.97 |
| Rongyou No.18    | 5.16 | 1.63 | 25.48 | 26.44  | 44.72 | 9.24  | 19.05 | 1.35 | 61.41 | 4.05 | 3.08  | 3.69 |

|                    |      |      |       |        |       |       |       |      |       |      |      |      |
|--------------------|------|------|-------|--------|-------|-------|-------|------|-------|------|------|------|
| RQ011              | 3.69 | 1.69 | 21.58 | 26.12  | 46.55 | 10.82 | 18.52 | 1.28 | 59.46 | 4.33 | 3.93 | 4.69 |
| Shengguang 127     | 2.39 | 1.02 | 23.71 | 47.67  | 44.10 | 11.34 | 22.66 | 1.36 | 57.48 | 4.25 | 1.68 | 5.07 |
| Shengguang 77      | 4.22 | 1.23 | 22.02 | 46.42  | 44.46 | 10.23 | 21.28 | 1.21 | 58.95 | 4.37 | 1.20 | 4.15 |
| Shengguang 87      | 3.24 | 1.37 | 25.94 | 42.84  | 39.37 | 10.75 | 18.57 | 1.16 | 62.33 | 4.28 | 2.55 | 4.90 |
| Shuangyou No. 8    | 4.04 | 1.99 | 26.52 | 53.58  | 41.24 | 8.81  | 16.91 | 1.33 | 49.36 | 3.63 | 6.63 | 3.80 |
| SWU45              | 3.44 | 1.78 | 18.40 | 31.67  | 49.09 | 11.41 | 19.64 | 1.35 | 60.86 | 4.57 | 1.85 | 3.02 |
| T2159              | 3.01 | 1.36 | 20.68 | 70.69  | 45.93 | 9.54  | 15.28 | 1.07 | 35.62 | 3.33 | 8.46 | 3.82 |
| Wenyou 99          | 3.62 | 1.93 | 26.30 | 42.47  | 44.76 | 10.12 | 17.97 | 1.40 | 60.14 | 3.93 | 4.59 | 4.28 |
| Xiangyou No.15     | 4.67 | 2.71 | 24.07 | 35.05  | 46.09 | 10.14 | 18.05 | 1.21 | 64.33 | 3.84 | 1.95 | 4.31 |
| Xiangyouza No. 2   | 3.78 | 1.84 | 26.20 | 82.92  | 37.54 | 9.69  | 21.29 | 1.39 | 57.31 | 4.41 | 4.28 | 3.95 |
| Xiwang 528F1       | 4.14 | 1.59 | 25.46 | 39.34  | 40.30 | 9.86  | 20.69 | 1.36 | 57.71 | 4.22 | 3.61 | 3.61 |
| Xiwang 699         | 5.05 | 2.26 | 22.61 | 33.81  | 46.14 | 10.76 | 18.82 | 1.18 | 62.64 | 4.03 | 2.10 | 4.45 |
| Yangguang 198      | 4.14 | 2.10 | 23.60 | 40.32  | 44.16 | 9.14  | 18.29 | 1.28 | 62.45 | 3.85 | 2.90 | 4.09 |
| Yangguang 2009     | 3.79 | 2.06 | 23.75 | 39.71  | 44.47 | 9.17  | 18.06 | 1.26 | 62.28 | 3.83 | 3.14 | 4.07 |
| YB3                | 3.64 | 1.71 | 20.99 | 51.00  | 48.37 | 11.24 | 21.32 | 1.33 | 55.90 | 4.50 | 4.09 | 5.18 |
| Za 98033           | 4.48 | 1.96 | 26.12 | 38.32  | 40.92 | 7.85  | 19.26 | 1.38 | 64.48 | 4.11 | 2.70 | 3.69 |
| Zheda 619          | 4.29 | 1.87 | 22.28 | 44.83  | 45.58 | 10.87 | 16.86 | 1.28 | 58.64 | 3.96 | 4.47 | 3.49 |
| Zheshuang 758      | 4.14 | 1.89 | 23.19 | 86.69  | 43.86 | 9.29  | 16.20 | 1.20 | 39.59 | 3.60 | 8.33 | 3.57 |
| Zheshuang No. 3    | 4.31 | 2.19 | 23.22 | 55.00  | 44.57 | 9.78  | 18.69 | 1.30 | 58.09 | 4.05 | 3.96 | 3.83 |
| Zheshuang No. 8    | 4.71 | 2.14 | 19.29 | 26.32  | 47.65 | 6.95  | 13.67 | 0.65 | 70.00 | 3.94 | 3.26 | 3.50 |
| Zheyou 50          | 4.33 | 2.19 | 24.70 | 37.26  | 49.86 | 11.56 | 20.31 | 1.23 | 56.38 | 4.24 | 3.82 | 4.91 |
| Zhongduyou 998     | 3.49 | 1.71 | 24.21 | 105.98 | 43.42 | 10.55 | 13.62 | 0.85 | 38.08 | 3.28 | 7.48 | 4.41 |
| Zhongnongyou 2008  | 3.51 | 1.78 | 27.24 | 32.51  | 37.88 | 9.03  | 19.97 | 0.92 | 65.96 | 4.46 | 0.66 | 4.14 |
| Zhongshuang No. 10 | 4.24 | 1.93 | 22.69 | 39.85  | 46.77 | 9.55  | 17.62 | 1.09 | 60.78 | 3.87 | 2.90 | 3.89 |
| Zhongshuang No. 11 | 5.03 | 2.16 | 23.38 | 36.42  | 47.07 | 9.80  | 15.18 | 0.81 | 66.75 | 3.62 | 0.81 | 4.29 |

|                    |      |      |       |       |       |       |       |      |       |      |      |      |
|--------------------|------|------|-------|-------|-------|-------|-------|------|-------|------|------|------|
| Zhongshuang No. 12 | 3.41 | 1.50 | 22.57 | 39.56 | 43.14 | 9.36  | 18.41 | 1.10 | 61.23 | 4.04 | 2.21 | 3.34 |
| Zhongshuang No. 5  | 2.94 | 1.27 | 23.15 | 51.24 | 41.86 | 8.97  | 19.38 | 1.25 | 57.45 | 4.11 | 3.11 | 3.07 |
| Zhongshuang No. 6  | 4.15 | 2.04 | 24.38 | 41.27 | 40.86 | 10.35 | 19.12 | 1.30 | 57.97 | 4.09 | 4.12 | 3.79 |
| Zhongshuang No. 7  | 3.71 | 1.78 | 20.15 | 36.33 | 46.02 | 10.69 | 20.29 | 1.26 | 58.75 | 4.29 | 3.89 | 4.71 |
| Zhongshuang No. 8  | 4.25 | 2.51 | 23.42 | 37.29 | 46.05 | 9.59  | 16.50 | 0.90 | 64.62 | 3.70 | 1.55 | 4.01 |
| Zhongshuang No. 9  | 3.84 | 1.72 | 24.91 | 34.33 | 42.52 | 9.57  | 20.86 | 0.94 | 60.89 | 4.35 | 1.39 | 3.88 |
| Zhongyou 112       | 5.71 | 2.85 | 25.54 | 33.70 | 40.76 | 9.23  | 20.92 | 1.16 | 60.79 | 4.58 | 3.04 | 3.88 |
| Zhongyou 36        | 4.50 | 2.57 | 24.13 | 37.17 | 48.83 | 9.72  | 17.34 | 1.21 | 62.39 | 3.69 | 1.67 | 3.45 |
| Zhongyou 519       | 4.21 | 2.12 | 25.79 | 40.86 | 40.19 | 9.77  | 18.95 | 1.04 | 64.99 | 4.11 | 1.06 | 4.04 |
| Zhongyou 589       | 5.77 | 2.51 | 23.38 | 42.85 | 45.43 | 9.66  | 16.96 | 1.12 | 62.75 | 3.80 | 2.47 | 4.56 |
| Zhongyou 6766      | 3.89 | 2.10 | 23.43 | 41.04 | 42.32 | 10.00 | 17.29 | 1.21 | 60.69 | 3.68 | 2.59 | 3.85 |
| Zhongyou 821       | 5.15 | 2.94 | 25.16 | 53.47 | 42.91 | 8.80  | 18.05 | 1.12 | 61.12 | 3.99 | 3.12 | 3.59 |
| Zhongyouza 11      | 3.43 | 1.39 | 28.04 | 28.91 | 42.86 | 10.71 | 20.90 | 1.13 | 57.50 | 4.17 | 3.24 | 3.96 |
| Zhongyouza 12      | 3.94 | 2.05 | 23.88 | 44.20 | 43.38 | 9.41  | 17.82 | 1.03 | 58.71 | 3.84 | 2.36 | 3.57 |
| Zhongyouza 19      | 4.95 | 2.41 | 22.06 | 31.80 | 47.90 | 9.95  | 15.24 | 1.03 | 68.14 | 3.31 | 0.38 | 4.49 |
| Zhongyouza No 1    | 3.11 | 1.43 | 28.14 | 37.61 | 39.60 | 10.90 | 20.95 | 1.23 | 57.69 | 4.38 | 3.96 | 4.02 |

**Additional file 2: Primer sequence of the reference genes and candidate genes for qPT-PCR.**

| Gene ID       | Forward Primer (5' → 3') | Reverse primer (5' → 3') |
|---------------|--------------------------|--------------------------|
| BnaC09g47620D | GACGGTGATGTTCTTCTT       | CCTGCTTGTCCCTTCATAG      |
| BnaC08g12720D | GTGCTGCTATCTATCTGT       | TACTTGTTCTTGCTGTCT       |
| BnaA05g34050D | AAGATATGTATGATGACGATGAA  | ATAGCGAGTCTGTGAGTT       |
| BnaC05g29840D | AGGATGAACAATAAGAAGA      | AATCATTAGTCGTCTCTG       |
| BnaC01g01860D | GCCGAGGAAGAAGAAGAC       | GAGCAAGAAAGTCAATGATGTT   |
| BnaC02g06710D | GGCTAAGAAGACTAAGGA       | AGTAGGCATAATGAAGAGA      |
| BnaC03g78230D | AGATGCTGCTGTTGTAA        | CTTAGACCTTGAGGAACTG      |
| BnaC04g33060D | AGGTATTAGGTTGGAGGAAGA    | AGTATCATCGTCACCATTCC     |
| BnaA02g10660D | CATCTGTGAGTGGTAGTAA      | TAAGTGGATTGCCGTCTA       |
| BnaA02g08130D | GGTCTACAACACTACTACGAAT   | TCAGAGAAGCAACGAACT       |
| BnaA06g03420D | TCGCTGAGGAAGATTCT        | GTCATCGCTACTGCTATC       |
| BnaC03g29670D | GCTACGAACTACAAACAG       | CCACGAACTCAGAGATAC       |
| BnaA09g40900D | TTCCATACGCAGCAACAA       | TCTCTTTCTTCACCATCTTACG   |
| BnaA02g21230D | TCTGAGTTCGTGGTTATG       | CGGCACATTCTTATCTTC       |
| BnaA08g06270D | AGTAGTCGTCTTCAAGTA       | TGTAATCCTAATCCTCGTA      |
| BnaA08g25110D | ATGCTTCGTGTTGGTGAT       | AATCCTTCTCAAGAGTCTCATC   |
| BnaA01g14400D | GATAGTGATGGCGTTGGA       | CTCTTGAATCGTCGTAATGTT    |
| BnaC07g26240D | GGCAAGGAGAAGAAGGTTA      | TTGTTGTCGCAGAGGTAG       |
| BnaA03g08800D | AGGCTAAGAAGACTAAGG       | GTTGGCATAATGAAGAGA       |
| BnaC08g45610D | TGTTCCGTTATCTCTTATCC     | CGCCAGGTAGTATAGTCT       |
| BnaA04g15290D | CCTCAGTATGGTCAGTCA       | CGTAATAATCATAATCACCTTGT  |
| BnaA03g00380D | GGTTCAGGTATCTTCAAG       | GTCACTGTAATGAGTCAC       |

**Additional file 3: Throughput and quality of RNA-seq for the 18 libraries of Ganyouza No.5.**

The LT and CK indicate germination treatment under the low temperature and normal temperature, respectively.

| Sample | Raw data   |              | Clean data |              | Q30 (%) | Ratio of valid reads (%) |
|--------|------------|--------------|------------|--------------|---------|--------------------------|
|        | Base (bp)  | Reads Number | Base(bp)   | Reads Number |         |                          |
| LT-1d  | 4414827900 | 29432186     | 4349664717 | 29085360     | 91.84   | 98.82                    |
| LT-1d  | 4488426000 | 29922840     | 4416990859 | 29547158     | 91.72   | 98.74                    |
| LT-1d  | 3922709100 | 26151394     | 3859398517 | 25812898     | 91.6    | 98.71                    |
| CK-1d  | 4370804400 | 29138696     | 4299096482 | 28748920     | 91.52   | 98.66                    |
| CK-1d  | 5321328900 | 35475526     | 5222365607 | 34923964     | 90.88   | 98.45                    |
| CK-1d  | 5148978600 | 34326524     | 5065846372 | 33905606     | 91.92   | 98.77                    |
| LT-2d  | 4102443300 | 27349622     | 4039238339 | 27015970     | 91.84   | 98.78                    |
| LT-2d  | 4932360900 | 32882406     | 4860402464 | 32498240     | 91.99   | 98.83                    |
| LT-2d  | 4099739700 | 27331598     | 4039794286 | 27011000     | 92.06   | 98.83                    |
| CK-2d  | 4593468600 | 30623124     | 4522264286 | 30241252     | 91.65   | 98.75                    |
| CK-2d  | 4841014500 | 32273430     | 4770445268 | 31902078     | 91.98   | 98.85                    |
| CK-2d  | 4099084500 | 27327230     | 4037890951 | 27005034     | 91.87   | 98.82                    |
| LT-3d  | 4242447300 | 28282982     | 4175085813 | 27925034     | 91.76   | 98.73                    |
| LT-3d  | 5094772200 | 33965148     | 5024279432 | 33604186     | 92.31   | 98.94                    |
| LT-3d  | 4611284700 | 30741898     | 4538119008 | 30355482     | 91.78   | 98.74                    |
| CK-3d  | 4397909100 | 29319394     | 4319284319 | 28890280     | 91.07   | 98.54                    |
| CK-3d  | 4599842100 | 30665614     | 4530884919 | 30307820     | 91.9    | 98.83                    |
| CK-3d  | 4155921900 | 27706146     | 4085013846 | 27323422     | 91.43   | 98.62                    |



**Additional file 4: Throughput and quality of RNA-seq for the 18 libraries of Huawanyou No.4.**

The LT and CK indicate germination treatment under the low temperature and normal temperature, respectively.

| Sample | Raw data   |              | Clean data |              | Q30 (%) | Ratio of valid reads (%) |
|--------|------------|--------------|------------|--------------|---------|--------------------------|
|        | Base(bp)   | Reads Number | Base (bp)  | Reads Number |         |                          |
| LT-1d  | 4187365800 | 27915772     | 4150452676 | 27738296     | 93.86   | 99.36                    |
| LT-1d  | 4151149500 | 27674330     | 4105575151 | 27488382     | 93.93   | 99.33                    |
| LT-1d  | 3899643000 | 25997620     | 3862050281 | 25824266     | 93.89   | 99.33                    |
| CK-1d  | 3595458300 | 23969722     | 3555602928 | 23765456     | 93.69   | 99.15                    |
| CK-1d  | 4002381900 | 26682546     | 3958968936 | 26477222     | 93.85   | 99.23                    |
| CK-1d  | 3669741600 | 24464944     | 3626497723 | 24241230     | 93.52   | 99.09                    |
| LT-3d  | 3960329400 | 26402196     | 3918875407 | 26190742     | 93.52   | 99.2                     |
| LT-3d  | 3894786900 | 25965246     | 3854811666 | 25760102     | 93.9    | 99.21                    |
| LT-3d  | 4363171200 | 29087808     | 4320531561 | 28876002     | 94.04   | 99.27                    |
| CK-3d  | 3720571500 | 24803810     | 3686452323 | 24633976     | 93.9    | 99.32                    |
| CK-3d  | 4634362500 | 30895750     | 4594820740 | 30714214     | 94.24   | 99.41                    |
| CK-3d  | 4048966800 | 26993112     | 4010177981 | 26804162     | 93.98   | 99.3                     |
| LT-5d  | 4403937000 | 29359580     | 4367731221 | 29189312     | 94.32   | 99.42                    |
| LT-5d  | 4200576900 | 28003846     | 4157167802 | 27779534     | 93.81   | 99.2                     |
| LT-5d  | 4085359200 | 27235728     | 4042786989 | 27021904     | 93.62   | 99.21                    |
| CK-5d  | 4075603200 | 27170688     | 4040436397 | 26992274     | 93.89   | 99.34                    |
| CK-5d  | 4195327800 | 27968852     | 4159006723 | 27798442     | 94.18   | 99.39                    |
| CK-5d  | 3432098700 | 22880658     | 3395012818 | 22703822     | 92.84   | 99.23                    |

**Additional file 5: Gene dendrogram obtained by average linkage hierarchical clustering.** The gene dendrogram and module assignment are shown by the hierarchical clustering diagram. The color rows underneath the dendrogram shows the module assignment determined by the Dynamic Tree Cut and Merged Dynamic. The program algorithm firstly pre-clusters the different expressed genes into large clusters by using a variant of k-means clustering as shown in the top colorful row. The cluster-merging step is performed to merge modules whose eigengenes are high correlated, as shown in the bottom colorful row.

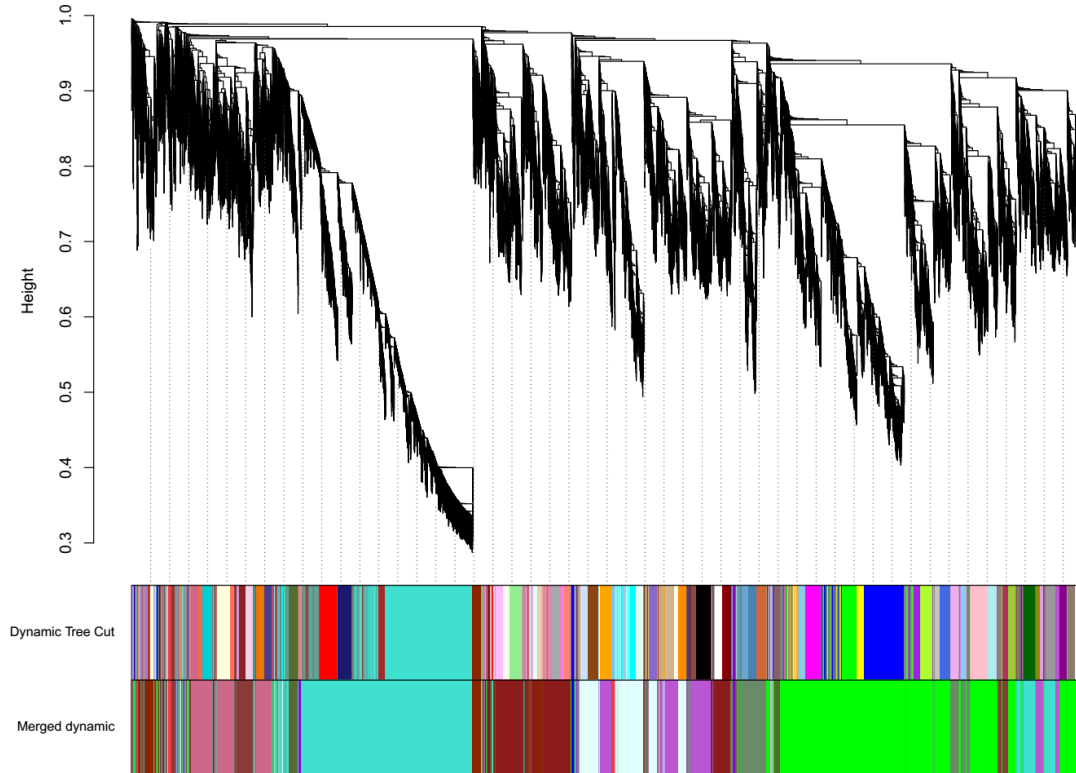

**Additional file 6: Topological overlap matrix for the co-expression network.** Topological overlap measure, a pairwise measure of node similarity indicates how close the neighbors of a gene are to the neighbors of the other gene. In the heatmap, each row and column corresponds to a gene, light color denotes low topological overlap, and progressively darker red denotes higher topological overlap. Darker squares along the diagonal correspond to modules. The gene dendrogram and module assignment are shown along the left and top.

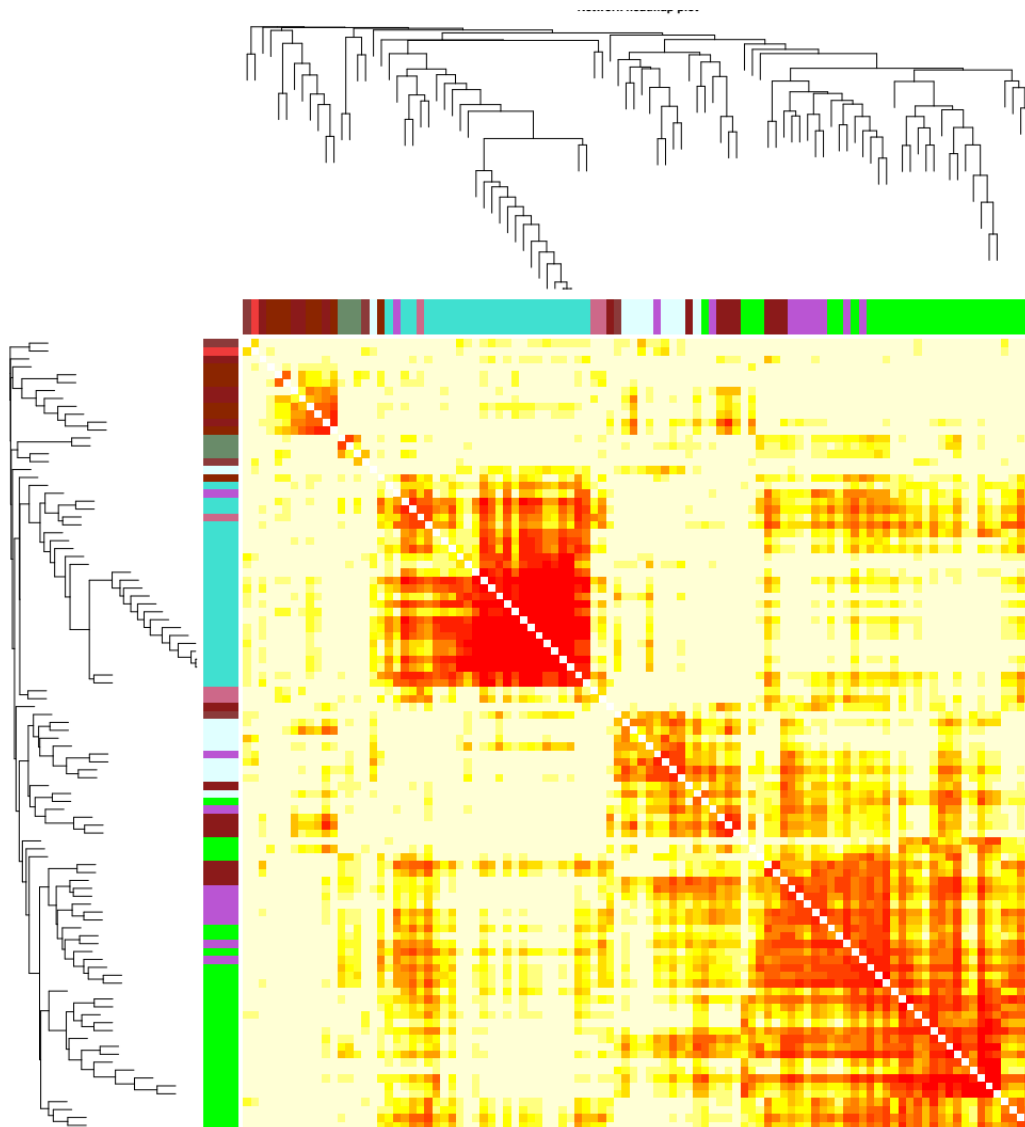

**Additional file 7: The venn diagram of up-regulated genes (A) and down-regulated genes (B) for FAG.** The FAG represents the genotype Ganyouza No.5, which have a fast germination speed under low temperature condition.

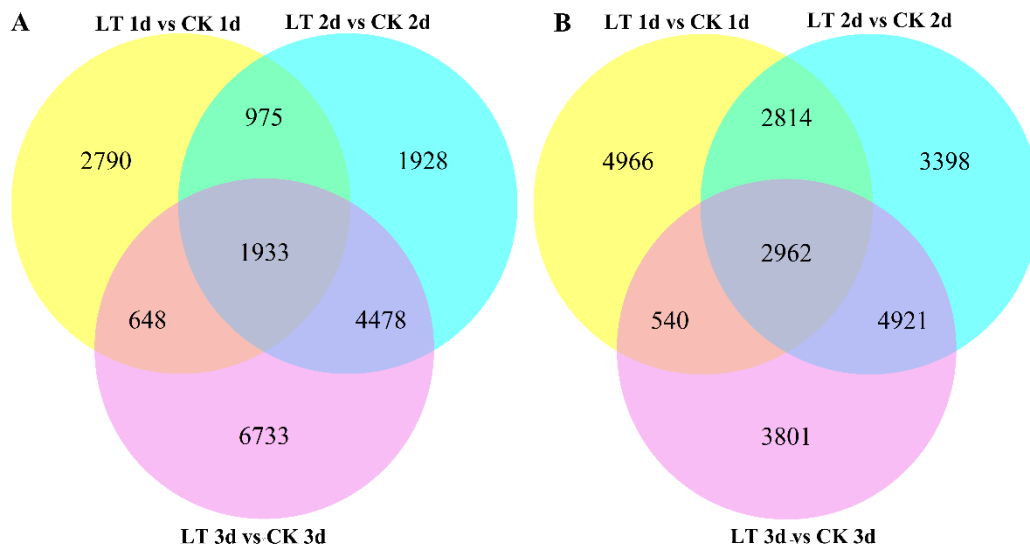

**Additional file 8: The venn diagram of up-regulated genes (A) and down-regulated genes (B) for SLG.** The SLG represents the genotype Huawanyou No.4, which have a slow germination speed under low temperature condition.

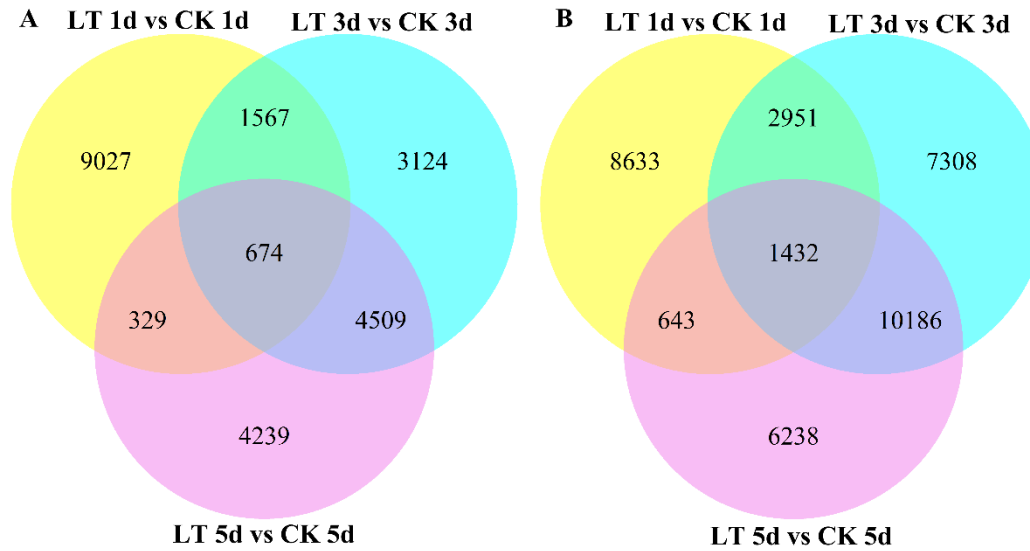

Supplement: 41598_2018_37099_MOESM1_ESM.pdf [file 41598_2018_37099_MOESM1_ESM.pdf]
